# Supplementary material for: The feasibility of virtual reality for anatomic training during temporal bone dissection course
Source: Frontiers journal article supplement (doi:10.3389/frvir.2022.957230), 2022-09-15
Supplement: Table_2.DOCX [file Table_2.DOCX]

**Supplementary material 2. The modified Hopkins Objective Structured Assessment of Technical Skill (OSATS) form.** The OSATS assessment form was modified to serve the schedule and the extent of dissection trained in the course. The excluded parts from original form were initial bone cuts, open facial recess, posterior atticotomy and the global section consisting of 10 items that assess processes and preparation. *(Laeeq K, Bhatti NI, Carey JP, Della Santina CC, Limb CJ, Niparko JK, et al. Pilot testing of an assessment tool for competency in mastoidectomy. 2009;119(12):2402–10.)*

|  |  |  |  |  |  |  |
| --- | --- | --- | --- | --- | --- | --- |
| Tasks | Unable to perform |  | Performs with minimal prompting |  | Easily performs with good flow |  |
| 1.Defining anatomic limits |
| 1. Identification and definition of tegmen | 1 | 2 | 3 | 4 | 5 | NA |
| 1. Sharpen posterior EAC cortex | 1 | 2 | 3 | 4 | 5 | NA |
| 1. Define sigmoid sinus and sino-dural angle | 1 | 2 | 3 | 4 | 5 | NA |
| 2. Open antrum |
| 1. Deepen dissection at sino-dural angle | 1 | 2 | 3 | 4 | 5 | NA |
| 1. Open antrum from posterior to anterior | 1 | 2 | 3 | 4 | 5 | NA |
| 1. Reveal short process of incus (atraumatic) | 1 | 2 | 3 | 4 | 5 | NA |
| 3. Digastric dissection |  | | | | | |
| 1. Define cephalic edge digastric muscle | 1 | 2 | 3 | 4 | 5 | NA |
| 1. Follow to SMF | 1 | 2 | 3 | 4 | 5 | NA |
| 4. Thin posterior EAC cortex (translucent) |  | | | | | |
| 1. Saucerization | 1 | 2 | 3 | 4 | 5 | NA |

EAC= external auditory canal, SMF= stylomastoid foramen
